# Supplementary material
Source: publisher figshare collection journal article supplement (https://tandf.figshare.com/ndownloader/files/37568789)
Supplement: Supplementary file 1 [file 37568789]

## Sheet: blue_genes
Supplementary Table 6 Blue module transcripts
	Module	Genes
57	blue	ENSBTAT00000017131
72	blue	ENSBTAT00000063883
81	blue	ENSBTAT00000026056
109	blue	ENSBTAT00000010479
114	blue	ENSBTAT00000006532
119	blue	ENSBTAT00000000079
125	blue	ENSBTAT00000022630
152	blue	ENSBTAT00000011257
153	blue	ENSBTAT00000046984
170	blue	ENSBTAT00000044163
175	blue	ENSBTAT00000024417
177	blue	ENSBTAT00000001536
183	blue	ENSBTAT00000025822
194	blue	ENSBTAT00000006918
211	blue	ENSBTAT00000050490
223	blue	ENSBTAT00000020406
225	blue	ENSBTAT00000007930
230	blue	ENSBTAT00000004892
248	blue	ENSBTAT00000043890
251	blue	ENSBTAT00000047589
256	blue	ENSBTAT00000001859
259	blue	ENSBTAT00000015235
268	blue	ENSBTAT00000005403
281	blue	ENSBTAT00000064843
282	blue	ENSBTAT00000007359
287	blue	ENSBTAT00000009662
288	blue	ENSBTAT00000011742
298	blue	ENSBTAT00000022258
302	blue	ENSBTAT00000016136
305	blue	ENSBTAT00000052101
309	blue	ENSBTAT00000025044
310	blue	ENSBTAT00000063372
315	blue	ENSBTAT00000000566
318	blue	ENSBTAT00000046544
327	blue	ENSBTAT00000028518
348	blue	ENSBTAT00000009385
353	blue	ENSBTAT00000003515
355	blue	ENSBTAT00000047009
363	blue	ENSBTAT00000022189
366	blue	ENSBTAT00000014097
367	blue	ENSBTAT00000032276
373	blue	ENSBTAT00000056583
374	blue	ENSBTAT00000044539
376	blue	ENSBTAT00000023566
381	blue	ENSBTAT00000063057
382	blue	ENSBTAT00000035230
387	blue	ENSBTAT00000000631
391	blue	ENSBTAT00000007019
392	blue	ENSBTAT00000017580
398	blue	ENSBTAT00000025308
403	blue	ENSBTAT00000001567
406	blue	ENSBTAT00000015811
414	blue	ENSBTAT00000026726
415	blue	ENSBTAT00000065446
417	blue	ENSBTAT00000047015
419	blue	ENSBTAT00000007444
422	blue	ENSBTAT00000025371
432	blue	ENSBTAT00000037406
433	blue	ENSBTAT00000013956
434	blue	ENSBTAT00000014100
435	blue	ENSBTAT00000014572
436	blue	ENSBTAT00000039125
437	blue	ENSBTAT00000017988
441	blue	ENSBTAT00000002520
455	blue	ENSBTAT00000025996
459	blue	ENSBTAT00000021880
474	blue	ENSBTAT00000043227
476	blue	ENSBTAT00000002651
481	blue	ENSBTAT00000043753
488	blue	ENSBTAT00000015944
498	blue	ENSBTAT00000024965
499	blue	ENSBTAT00000017940
508	blue	ENSBTAT00000020200
514	blue	ENSBTAT00000021256
521	blue	ENSBTAT00000032362
522	blue	ENSBTAT00000000037
524	blue	ENSBTAT00000055244
525	blue	ENSBTAT00000001802
526	blue	ENSBTAT00000061009
534	blue	ENSBTAT00000043425
535	blue	ENSBTAT00000005810
536	blue	ENSBTAT00000001698
537	blue	ENSBTAT00000046225
539	blue	ENSBTAT00000026928
540	blue	ENSBTAT00000001919
547	blue	ENSBTAT00000054029
557	blue	ENSBTAT00000009440
570	blue	ENSBTAT00000017141
571	blue	ENSBTAT00000065988
575	blue	ENSBTAT00000019322
598	blue	ENSBTAT00000028361
599	blue	ENSBTAT00000024569
600	blue	ENSBTAT00000024393
602	blue	ENSBTAT00000066043
619	blue	ENSBTAT00000020847
628	blue	ENSBTAT00000053663
630	blue	ENSBTAT00000010309
636	blue	ENSBTAT00000019734
645	blue	ENSBTAT00000022100
654	blue	ENSBTAT00000026288
665	blue	ENSBTAT00000013464
666	blue	ENSBTAT00000035225
670	blue	ENSBTAT00000001770
673	blue	ENSBTAT00000022636
674	blue	ENSBTAT00000063390
675	blue	ENSBTAT00000020148
676	blue	ENSBTAT00000061075
678	blue	ENSBTAT00000012201
686	blue	ENSBTAT00000011690
693	blue	ENSBTAT00000030486
695	blue	ENSBTAT00000017516
699	blue	ENSBTAT00000066128
705	blue	ENSBTAT00000003483
709	blue	ENSBTAT00000016993
719	blue	ENSBTAT00000001447
720	blue	ENSBTAT00000002785
722	blue	ENSBTAT00000012655
724	blue	ENSBTAT00000023198
736	blue	ENSBTAT00000002984
737	blue	ENSBTAT00000019232
740	blue	ENSBTAT00000016887
748	blue	ENSBTAT00000015873
753	blue	ENSBTAT00000002986
754	blue	ENSBTAT00000022720
755	blue	ENSBTAT00000063728
761	blue	ENSBTAT00000064202
766	blue	ENSBTAT00000018402
772	blue	ENSBTAT00000027210
776	blue	ENSBTAT00000044541
777	blue	ENSBTAT00000066170
787	blue	ENSBTAT00000007942
789	blue	ENSBTAT00000032937
792	blue	ENSBTAT00000013127
793	blue	ENSBTAT00000013808
799	blue	ENSBTAT00000014625
803	blue	ENSBTAT00000064763
806	blue	ENSBTAT00000006376
809	blue	ENSBTAT00000046968
813	blue	ENSBTAT00000028392
817	blue	ENSBTAT00000045090
818	blue	ENSBTAT00000038022
824	blue	ENSBTAT00000013713
825	blue	ENSBTAT00000054608
826	blue	ENSBTAT00000046142
838	blue	ENSBTAT00000020298
840	blue	ENSBTAT00000055799
843	blue	ENSBTAT00000037267
844	blue	ENSBTAT00000030663
846	blue	ENSBTAT00000024902
847	blue	ENSBTAT00000011496
850	blue	ENSBTAT00000044160
852	blue	ENSBTAT00000025020
856	blue	ENSBTAT00000061640
857	blue	ENSBTAT00000026956
862	blue	ENSBTAT00000065424
868	blue	ENSBTAT00000045994
870	blue	ENSBTAT00000035798
872	blue	ENSBTAT00000008444
875	blue	ENSBTAT00000027359
884	blue	ENSBTAT00000047200
886	blue	ENSBTAT00000014308
887	blue	ENSBTAT00000060663
888	blue	ENSBTAT00000064602
890	blue	ENSBTAT00000015924
894	blue	ENSBTAT00000027444
895	blue	ENSBTAT00000023304
897	blue	ENSBTAT00000052818
900	blue	ENSBTAT00000042889
907	blue	ENSBTAT00000065659
909	blue	ENSBTAT00000038885
919	blue	ENSBTAT00000020023
921	blue	ENSBTAT00000026725
934	blue	ENSBTAT00000021398
937	blue	ENSBTAT00000011009
938	blue	ENSBTAT00000033400
943	blue	ENSBTAT00000063257
948	blue	ENSBTAT00000021267
949	blue	ENSBTAT00000013146
953	blue	ENSBTAT00000023206
954	blue	ENSBTAT00000015059
955	blue	ENSBTAT00000000506
959	blue	ENSBTAT00000055713
960	blue	ENSBTAT00000036144
971	blue	ENSBTAT00000033544
974	blue	ENSBTAT00000005313
978	blue	ENSBTAT00000061571
981	blue	ENSBTAT00000038684
983	blue	ENSBTAT00000061473
984	blue	ENSBTAT00000008431
987	blue	ENSBTAT00000021168
990	blue	ENSBTAT00000019626
991	blue	ENSBTAT00000011670
1001	blue	ENSBTAT00000009857
1002	blue	ENSBTAT00000017177
1005	blue	ENSBTAT00000034054
1008	blue	ENSBTAT00000008887
1012	blue	ENSBTAT00000011332
1017	blue	ENSBTAT00000013690
1021	blue	ENSBTAT00000043087
1030	blue	ENSBTAT00000028988
1037	blue	ENSBTAT00000000101
1040	blue	ENSBTAT00000022949
1044	blue	ENSBTAT00000044628
1048	blue	ENSBTAT00000011458
1058	blue	ENSBTAT00000020833
1063	blue	ENSBTAT00000008177
1066	blue	ENSBTAT00000000433
1073	blue	ENSBTAT00000025319
1081	blue	ENSBTAT00000029870
1083	blue	ENSBTAT00000007918
1085	blue	ENSBTAT00000004243
1091	blue	ENSBTAT00000006312
1098	blue	ENSBTAT00000000159
1100	blue	ENSBTAT00000063624
1101	blue	ENSBTAT00000008319
1102	blue	ENSBTAT00000005380
1107	blue	ENSBTAT00000061495
1109	blue	ENSBTAT00000010858
1115	blue	ENSBTAT00000039858
1116	blue	ENSBTAT00000000389
1118	blue	ENSBTAT00000021336
1122	blue	ENSBTAT00000014306
1124	blue	ENSBTAT00000063600
1125	blue	ENSBTAT00000000064
1135	blue	ENSBTAT00000016239
1136	blue	ENSBTAT00000064129
1142	blue	ENSBTAT00000010949
1151	blue	ENSBTAT00000020790
1154	blue	ENSBTAT00000026621
1163	blue	ENSBTAT00000049292
1167	blue	ENSBTAT00000042839
1168	blue	ENSBTAT00000062467
1171	blue	ENSBTAT00000016768
1174	blue	ENSBTAT00000009897
1182	blue	ENSBTAT00000045859
1193	blue	ENSBTAT00000000244
1194	blue	ENSBTAT00000027191
1197	blue	ENSBTAT00000023750
1204	blue	ENSBTAT00000020512
1206	blue	ENSBTAT00000003394
1215	blue	ENSBTAT00000029099
1218	blue	ENSBTAT00000013093
1224	blue	ENSBTAT00000014152
1228	blue	ENSBTAT00000026486
1233	blue	ENSBTAT00000028637
1234	blue	ENSBTAT00000034075
1235	blue	ENSBTAT00000027623
1236	blue	ENSBTAT00000000145
1245	blue	ENSBTAT00000063542
1247	blue	ENSBTAT00000028958
1260	blue	ENSBTAT00000003589
1261	blue	ENSBTAT00000024307
1262	blue	ENSBTAT00000027379
1271	blue	ENSBTAT00000023668
1273	blue	ENSBTAT00000023496
1277	blue	ENSBTAT00000026027
1280	blue	ENSBTAT00000001068
1283	blue	ENSBTAT00000014720
1284	blue	ENSBTAT00000020427
1287	blue	ENSBTAT00000063192
1289	blue	ENSBTAT00000017935
1296	blue	ENSBTAT00000017556
1306	blue	ENSBTAT00000027820
1309	blue	ENSBTAT00000005239
1310	blue	ENSBTAT00000004736
1313	blue	ENSBTAT00000014968
1315	blue	ENSBTAT00000015319
1316	blue	ENSBTAT00000018339
1335	blue	ENSBTAT00000063744
1342	blue	ENSBTAT00000009971
1349	blue	ENSBTAT00000063521
1352	blue	ENSBTAT00000003991
1357	blue	ENSBTAT00000032269
1364	blue	ENSBTAT00000045923
1365	blue	ENSBTAT00000063490
1369	blue	ENSBTAT00000028880
1373	blue	ENSBTAT00000012454
1381	blue	ENSBTAT00000024314
1384	blue	ENSBTAT00000003755
1390	blue	ENSBTAT00000046152
1393	blue	ENSBTAT00000019403
1395	blue	ENSBTAT00000027163
1398	blue	ENSBTAT00000009128
1403	blue	ENSBTAT00000017416
1405	blue	ENSBTAT00000044049
1412	blue	ENSBTAT00000010998
1416	blue	ENSBTAT00000064442
1418	blue	ENSBTAT00000001785
1427	blue	ENSBTAT00000065648
1431	blue	ENSBTAT00000052388
1436	blue	ENSBTAT00000020272
1439	blue	ENSBTAT00000048862
1443	blue	ENSBTAT00000064188
1444	blue	ENSBTAT00000008517
1459	blue	ENSBTAT00000008335
1461	blue	ENSBTAT00000008440
1463	blue	ENSBTAT00000022993
1464	blue	ENSBTAT00000023209
1465	blue	ENSBTAT00000066020
1469	blue	ENSBTAT00000063159
1477	blue	ENSBTAT00000039655
1478	blue	ENSBTAT00000002398
1480	blue	ENSBTAT00000016060
1482	blue	ENSBTAT00000005275
1483	blue	ENSBTAT00000008169
1484	blue	ENSBTAT00000036474
1494	blue	ENSBTAT00000042687
1496	blue	ENSBTAT00000017647
1497	blue	ENSBTAT00000021123
1500	blue	ENSBTAT00000031330
1503	blue	ENSBTAT00000010661
1507	blue	ENSBTAT00000005162
1508	blue	ENSBTAT00000016013
1512	blue	ENSBTAT00000056899
1518	blue	ENSBTAT00000064900
1525	blue	ENSBTAT00000025732
1533	blue	ENSBTAT00000007519
1536	blue	ENSBTAT00000026322
1537	blue	ENSBTAT00000007465
1539	blue	ENSBTAT00000046801
1540	blue	ENSBTAT00000025499
1541	blue	ENSBTAT00000020226
1550	blue	ENSBTAT00000028639
1551	blue	ENSBTAT00000012059
1554	blue	ENSBTAT00000028235
1558	blue	ENSBTAT00000028239
1560	blue	ENSBTAT00000028277
1563	blue	ENSBTAT00000030260
1564	blue	ENSBTAT00000065556
1567	blue	ENSBTAT00000038517
1568	blue	ENSBTAT00000024600
1570	blue	ENSBTAT00000028655
1571	blue	ENSBTAT00000019855
1577	blue	ENSBTAT00000053995
1591	blue	ENSBTAT00000046161
1595	blue	ENSBTAT00000016671
1603	blue	ENSBTAT00000020009
1604	blue	ENSBTAT00000027889
1612	blue	ENSBTAT00000014176
1615	blue	ENSBTAT00000060345
1617	blue	ENSBTAT00000043235
1619	blue	ENSBTAT00000061244
1621	blue	ENSBTAT00000006547
1624	blue	ENSBTAT00000044138
1626	blue	ENSBTAT00000015396
1627	blue	ENSBTAT00000000935
1628	blue	ENSBTAT00000010698
1630	blue	ENSBTAT00000009992
1631	blue	ENSBTAT00000060631
1638	blue	ENSBTAT00000021435
1641	blue	ENSBTAT00000034373
1642	blue	ENSBTAT00000001993
1643	blue	ENSBTAT00000029891
1644	blue	ENSBTAT00000012030
1645	blue	ENSBTAT00000006474
1646	blue	ENSBTAT00000011098
1652	blue	ENSBTAT00000015726
1654	blue	ENSBTAT00000004836
1656	blue	ENSBTAT00000012394
1658	blue	ENSBTAT00000065483
1659	blue	ENSBTAT00000040368
1661	blue	ENSBTAT00000008676
1664	blue	ENSBTAT00000028350
1670	blue	ENSBTAT00000029468
1671	blue	ENSBTAT00000012523
1675	blue	ENSBTAT00000050064
1686	blue	ENSBTAT00000022455
1687	blue	ENSBTAT00000017600
1688	blue	ENSBTAT00000012701
1693	blue	ENSBTAT00000066249
1695	blue	ENSBTAT00000017500
1698	blue	ENSBTAT00000032142
1699	blue	ENSBTAT00000007235
1701	blue	ENSBTAT00000016104
1703	blue	ENSBTAT00000010687
1706	blue	ENSBTAT00000008143
1717	blue	ENSBTAT00000022660
1719	blue	ENSBTAT00000012912
1724	blue	ENSBTAT00000031344
1731	blue	ENSBTAT00000048956
1734	blue	ENSBTAT00000023234
1739	blue	ENSBTAT00000034419
1741	blue	ENSBTAT00000022647
1744	blue	ENSBTAT00000030306
1751	blue	ENSBTAT00000031335
1758	blue	ENSBTAT00000020150
1763	blue	ENSBTAT00000000353
1765	blue	ENSBTAT00000021501
1770	blue	ENSBTAT00000017828
1786	blue	ENSBTAT00000002944
1790	blue	ENSBTAT00000018808
1795	blue	ENSBTAT00000001161
1796	blue	ENSBTAT00000066011
1798	blue	ENSBTAT00000023751
1800	blue	ENSBTAT00000019753
1801	blue	ENSBTAT00000056799
1803	blue	ENSBTAT00000005267
1808	blue	ENSBTAT00000013813
1809	blue	ENSBTAT00000039835
1812	blue	ENSBTAT00000034095
1814	blue	ENSBTAT00000064537
1817	blue	ENSBTAT00000001646
1818	blue	ENSBTAT00000021953
1823	blue	ENSBTAT00000013968
1830	blue	ENSBTAT00000025691
1835	blue	ENSBTAT00000017445
1839	blue	ENSBTAT00000012724
1840	blue	ENSBTAT00000016376
1841	blue	ENSBTAT00000053363
1846	blue	ENSBTAT00000010103
1868	blue	ENSBTAT00000060957
1876	blue	ENSBTAT00000026009
1877	blue	ENSBTAT00000007429
1880	blue	ENSBTAT00000014745
1884	blue	ENSBTAT00000033862
1886	blue	ENSBTAT00000024387
1888	blue	ENSBTAT00000020867
1891	blue	ENSBTAT00000027628
1895	blue	ENSBTAT00000020286
1902	blue	ENSBTAT00000009398
1903	blue	ENSBTAT00000060987
1905	blue	ENSBTAT00000014907
1906	blue	ENSBTAT00000054977
1909	blue	ENSBTAT00000007478
1910	blue	ENSBTAT00000017430
1916	blue	ENSBTAT00000012176
1917	blue	ENSBTAT00000021483
1918	blue	ENSBTAT00000010649
1924	blue	ENSBTAT00000064986
1926	blue	ENSBTAT00000026118
1927	blue	ENSBTAT00000005575
1930	blue	ENSBTAT00000064114
1932	blue	ENSBTAT00000027478
1940	blue	ENSBTAT00000045504
1943	blue	ENSBTAT00000020493
1944	blue	ENSBTAT00000032574
1947	blue	ENSBTAT00000014711
1950	blue	ENSBTAT00000027635
1951	blue	ENSBTAT00000021614
1954	blue	ENSBTAT00000019237
1956	blue	ENSBTAT00000002656
1957	blue	ENSBTAT00000024549
1958	blue	ENSBTAT00000064674
1963	blue	ENSBTAT00000030941
1964	blue	ENSBTAT00000007684
1967	blue	ENSBTAT00000014385
1968	blue	ENSBTAT00000011329
1969	blue	ENSBTAT00000054446
1978	blue	ENSBTAT00000011924
1979	blue	ENSBTAT00000048333
1981	blue	ENSBTAT00000021330
1982	blue	ENSBTAT00000061385
1984	blue	ENSBTAT00000007531
1987	blue	ENSBTAT00000023490
1997	blue	ENSBTAT00000061509
1998	blue	ENSBTAT00000001671
2007	blue	ENSBTAT00000010066
2010	blue	ENSBTAT00000009350
2015	blue	ENSBTAT00000025007
2017	blue	ENSBTAT00000003040
2022	blue	ENSBTAT00000014038
2023	blue	ENSBTAT00000054341
2024	blue	ENSBTAT00000001146
2028	blue	ENSBTAT00000055113
2031	blue	ENSBTAT00000026782
2032	blue	ENSBTAT00000022638
2033	blue	ENSBTAT00000004810
2038	blue	ENSBTAT00000013448
2040	blue	ENSBTAT00000018566
2041	blue	ENSBTAT00000013699
2044	blue	ENSBTAT00000005998
2046	blue	ENSBTAT00000017710
2049	blue	ENSBTAT00000027861
2050	blue	ENSBTAT00000003197
2051	blue	ENSBTAT00000010972
2052	blue	ENSBTAT00000007304
2053	blue	ENSBTAT00000061494
2054	blue	ENSBTAT00000014288
2056	blue	ENSBTAT00000017579
2061	blue	ENSBTAT00000022619
2068	blue	ENSBTAT00000047899
2079	blue	ENSBTAT00000029502
2086	blue	ENSBTAT00000022298
2095	blue	ENSBTAT00000008727
2098	blue	ENSBTAT00000027603
2100	blue	ENSBTAT00000063075
2101	blue	ENSBTAT00000001890
2103	blue	ENSBTAT00000009308
2108	blue	ENSBTAT00000005765
2109	blue	ENSBTAT00000000902
2110	blue	ENSBTAT00000025752
2112	blue	ENSBTAT00000049925
2113	blue	ENSBTAT00000064130
2119	blue	ENSBTAT00000039812
2121	blue	ENSBTAT00000000276
2129	blue	ENSBTAT00000004411
2133	blue	ENSBTAT00000064821
2134	blue	ENSBTAT00000012167
2136	blue	ENSBTAT00000062994
2140	blue	ENSBTAT00000029279
2152	blue	ENSBTAT00000019303
2154	blue	ENSBTAT00000036631
2155	blue	ENSBTAT00000007762
2162	blue	ENSBTAT00000007925
2164	blue	ENSBTAT00000007187
2166	blue	ENSBTAT00000000450
2170	blue	ENSBTAT00000066269
2171	blue	ENSBTAT00000002297
2173	blue	ENSBTAT00000064011
2174	blue	ENSBTAT00000043205
2177	blue	ENSBTAT00000061376
2179	blue	ENSBTAT00000016629
2182	blue	ENSBTAT00000022460
2184	blue	ENSBTAT00000000901
2185	blue	ENSBTAT00000028602
2189	blue	ENSBTAT00000024794
2192	blue	ENSBTAT00000004098
2196	blue	ENSBTAT00000026850
2198	blue	ENSBTAT00000016592
2201	blue	ENSBTAT00000001519
2202	blue	ENSBTAT00000025754
2204	blue	ENSBTAT00000012409
2205	blue	ENSBTAT00000024045
2208	blue	ENSBTAT00000007264
2209	blue	ENSBTAT00000024011
2210	blue	ENSBTAT00000038128
2216	blue	ENSBTAT00000059593
2218	blue	ENSBTAT00000021426
2223	blue	ENSBTAT00000025212
2224	blue	ENSBTAT00000043278
2232	blue	ENSBTAT00000001799
2233	blue	ENSBTAT00000052708
2237	blue	ENSBTAT00000007833
2241	blue	ENSBTAT00000049195
2244	blue	ENSBTAT00000027169
2245	blue	ENSBTAT00000031878
2246	blue	ENSBTAT00000004721
2255	blue	ENSBTAT00000002383
2259	blue	ENSBTAT00000005603
2261	blue	ENSBTAT00000011874
2264	blue	ENSBTAT00000006422
2267	blue	ENSBTAT00000013284
2276	blue	ENSBTAT00000011169
2282	blue	ENSBTAT00000002513
2295	blue	ENSBTAT00000016137
2297	blue	ENSBTAT00000017303
2299	blue	ENSBTAT00000017473
2302	blue	ENSBTAT00000015786
2312	blue	ENSBTAT00000010553
2321	blue	ENSBTAT00000029348
2328	blue	ENSBTAT00000047021
2331	blue	ENSBTAT00000065463
2337	blue	ENSBTAT00000019328
2339	blue	ENSBTAT00000006490
2343	blue	ENSBTAT00000010666
2344	blue	ENSBTAT00000009173
2346	blue	ENSBTAT00000061346
2352	blue	ENSBTAT00000033040
2353	blue	ENSBTAT00000014744
2356	blue	ENSBTAT00000016415
2358	blue	ENSBTAT00000044949
2359	blue	ENSBTAT00000008193
2361	blue	ENSBTAT00000013304
2365	blue	ENSBTAT00000063553
2367	blue	ENSBTAT00000012046
2371	blue	ENSBTAT00000000109
2372	blue	ENSBTAT00000036890
2373	blue	ENSBTAT00000065390
2379	blue	ENSBTAT00000007124
2382	blue	ENSBTAT00000034438
2391	blue	ENSBTAT00000004969
2394	blue	ENSBTAT00000012910
2395	blue	ENSBTAT00000065908
2401	blue	ENSBTAT00000016224
2404	blue	ENSBTAT00000007691
2406	blue	ENSBTAT00000006494
2411	blue	ENSBTAT00000017314
2413	blue	ENSBTAT00000034384
2414	blue	ENSBTAT00000020304
2422	blue	ENSBTAT00000016983
2427	blue	ENSBTAT00000014659
2428	blue	ENSBTAT00000009774
2432	blue	ENSBTAT00000025149
2437	blue	ENSBTAT00000001895
2438	blue	ENSBTAT00000015194
2442	blue	ENSBTAT00000045437
2443	blue	ENSBTAT00000028174
2445	blue	ENSBTAT00000010538
2447	blue	ENSBTAT00000028421
2452	blue	ENSBTAT00000021570
2454	blue	ENSBTAT00000001452
2456	blue	ENSBTAT00000008569
2460	blue	ENSBTAT00000005793
2463	blue	ENSBTAT00000006040
2465	blue	ENSBTAT00000050559
2466	blue	ENSBTAT00000028221
2468	blue	ENSBTAT00000028188
2473	blue	ENSBTAT00000000557
2479	blue	ENSBTAT00000002578
2482	blue	ENSBTAT00000016666
2484	blue	ENSBTAT00000002051
2485	blue	ENSBTAT00000008190
2486	blue	ENSBTAT00000008327
2487	blue	ENSBTAT00000003437
2496	blue	ENSBTAT00000000950
2501	blue	ENSBTAT00000031912
2512	blue	ENSBTAT00000054742
2515	blue	ENSBTAT00000031107
2516	blue	ENSBTAT00000036888
2517	blue	ENSBTAT00000026669
2519	blue	ENSBTAT00000002419
2521	blue	ENSBTAT00000037998
2529	blue	ENSBTAT00000000322
2533	blue	ENSBTAT00000045814
2534	blue	ENSBTAT00000023500
2538	blue	ENSBTAT00000047585
2539	blue	ENSBTAT00000033676
2540	blue	ENSBTAT00000042598
2545	blue	ENSBTAT00000002831
2550	blue	ENSBTAT00000008987
2554	blue	ENSBTAT00000027875
2557	blue	ENSBTAT00000021144
2560	blue	ENSBTAT00000012270
2568	blue	ENSBTAT00000000589
2570	blue	ENSBTAT00000001128
2571	blue	ENSBTAT00000000573
2574	blue	ENSBTAT00000005523
2584	blue	ENSBTAT00000007338
2589	blue	ENSBTAT00000002457
2590	blue	ENSBTAT00000014796
2591	blue	ENSBTAT00000056632
2596	blue	ENSBTAT00000027233
2597	blue	ENSBTAT00000045888
2599	blue	ENSBTAT00000004304
2600	blue	ENSBTAT00000046362
2603	blue	ENSBTAT00000021183
2606	blue	ENSBTAT00000034508
2612	blue	ENSBTAT00000034533
2615	blue	ENSBTAT00000025661
2617	blue	ENSBTAT00000061141
2632	blue	ENSBTAT00000020581
2638	blue	ENSBTAT00000002228
2642	blue	ENSBTAT00000063772
2644	blue	ENSBTAT00000063132
2645	blue	ENSBTAT00000023218
2653	blue	ENSBTAT00000025870
2656	blue	ENSBTAT00000002652
2658	blue	ENSBTAT00000012512
2660	blue	ENSBTAT00000003055
2661	blue	ENSBTAT00000010606
2664	blue	ENSBTAT00000006418
2676	blue	ENSBTAT00000066041
2678	blue	ENSBTAT00000014187
2680	blue	ENSBTAT00000000289
2682	blue	ENSBTAT00000026719
2683	blue	ENSBTAT00000061283
2692	blue	ENSBTAT00000024181
2696	blue	ENSBTAT00000017783
2697	blue	ENSBTAT00000001463
2698	blue	ENSBTAT00000022847
2700	blue	ENSBTAT00000002161
2703	blue	ENSBTAT00000031159
2706	blue	ENSBTAT00000029526
2715	blue	ENSBTAT00000018572
2728	blue	ENSBTAT00000008609
2737	blue	ENSBTAT00000019259
2739	blue	ENSBTAT00000025380
2740	blue	ENSBTAT00000020385
2743	blue	ENSBTAT00000053059
2744	blue	ENSBTAT00000001096
2750	blue	ENSBTAT00000060760
2761	blue	ENSBTAT00000010141
2763	blue	ENSBTAT00000061073
2766	blue	ENSBTAT00000044457
2767	blue	ENSBTAT00000035335
2768	blue	ENSBTAT00000037080
2771	blue	ENSBTAT00000065769
2775	blue	ENSBTAT00000014479
2777	blue	ENSBTAT00000029554
2784	blue	ENSBTAT00000003219
2785	blue	ENSBTAT00000028645
2791	blue	ENSBTAT00000018478
2796	blue	ENSBTAT00000064473
2801	blue	ENSBTAT00000064751
2807	blue	ENSBTAT00000033274
2811	blue	ENSBTAT00000006601
2812	blue	ENSBTAT00000043035
2813	blue	ENSBTAT00000063984
2816	blue	ENSBTAT00000035098
2817	blue	ENSBTAT00000008604
2821	blue	ENSBTAT00000025426
2822	blue	ENSBTAT00000016845
2832	blue	ENSBTAT00000045869
2834	blue	ENSBTAT00000024376
2837	blue	ENSBTAT00000004378
2839	blue	ENSBTAT00000002542
2841	blue	ENSBTAT00000066047
2845	blue	ENSBTAT00000007761
2854	blue	ENSBTAT00000008019
2855	blue	ENSBTAT00000027897
2864	blue	ENSBTAT00000052142
2865	blue	ENSBTAT00000048415
2866	blue	ENSBTAT00000025422
2871	blue	ENSBTAT00000028588
2875	blue	ENSBTAT00000002948
2881	blue	ENSBTAT00000014505
2882	blue	ENSBTAT00000015439
2889	blue	ENSBTAT00000009097
2893	blue	ENSBTAT00000029257
2895	blue	ENSBTAT00000029505
2896	blue	ENSBTAT00000021162
2900	blue	ENSBTAT00000010790
2901	blue	ENSBTAT00000026679
2902	blue	ENSBTAT00000002548
2903	blue	ENSBTAT00000011246
2912	blue	ENSBTAT00000064686
2924	blue	ENSBTAT00000029203
2925	blue	ENSBTAT00000010741
2929	blue	ENSBTAT00000029813
2935	blue	ENSBTAT00000065979
2939	blue	ENSBTAT00000000941
2941	blue	ENSBTAT00000001844
2950	blue	ENSBTAT00000008170
2955	blue	ENSBTAT00000010303
2960	blue	ENSBTAT00000065071
2969	blue	ENSBTAT00000012905
2976	blue	ENSBTAT00000021077
2983	blue	ENSBTAT00000020655
2986	blue	ENSBTAT00000017663
2991	blue	ENSBTAT00000006825
2997	blue	ENSBTAT00000004546
3000	blue	ENSBTAT00000000849
3002	blue	ENSBTAT00000001081
3008	blue	ENSBTAT00000021677
3015	blue	ENSBTAT00000039717
3018	blue	ENSBTAT00000023587
3025	blue	ENSBTAT00000004480
3036	blue	ENSBTAT00000010400
3037	blue	ENSBTAT00000001019
3038	blue	ENSBTAT00000001405
3039	blue	ENSBTAT00000011772
3042	blue	ENSBTAT00000015997
3043	blue	ENSBTAT00000019338
3056	blue	ENSBTAT00000013121
3060	blue	ENSBTAT00000000878
3064	blue	ENSBTAT00000031313
3073	blue	ENSBTAT00000019081
3075	blue	ENSBTAT00000032952
3081	blue	ENSBTAT00000008382
3084	blue	ENSBTAT00000005780
3086	blue	ENSBTAT00000056576
3087	blue	ENSBTAT00000017775
3093	blue	ENSBTAT00000026146
3094	blue	ENSBTAT00000027753
3099	blue	ENSBTAT00000024713
3102	blue	ENSBTAT00000017442
3110	blue	ENSBTAT00000046197
3113	blue	ENSBTAT00000065105
3116	blue	ENSBTAT00000003327
3118	blue	ENSBTAT00000009523
3119	blue	ENSBTAT00000031231
3123	blue	ENSBTAT00000063314
3129	blue	ENSBTAT00000064521
3141	blue	ENSBTAT00000001599
3144	blue	ENSBTAT00000056113
3148	blue	ENSBTAT00000020990
3151	blue	ENSBTAT00000028523
3154	blue	ENSBTAT00000056479
3157	blue	ENSBTAT00000060955
3162	blue	ENSBTAT00000027427
3163	blue	ENSBTAT00000004277
3172	blue	ENSBTAT00000023199
3173	blue	ENSBTAT00000017446
3178	blue	ENSBTAT00000048774
3180	blue	ENSBTAT00000010457
3181	blue	ENSBTAT00000010968
3185	blue	ENSBTAT00000045065
3191	blue	ENSBTAT00000011265
3192	blue	ENSBTAT00000049814
3197	blue	ENSBTAT00000027807
3199	blue	ENSBTAT00000024467
3202	blue	ENSBTAT00000011513
3204	blue	ENSBTAT00000028022
3207	blue	ENSBTAT00000064229
3211	blue	ENSBTAT00000061642
3213	blue	ENSBTAT00000038369
3215	blue	ENSBTAT00000060892
3218	blue	ENSBTAT00000009185
3220	blue	ENSBTAT00000006227
3222	blue	ENSBTAT00000028048
3227	blue	ENSBTAT00000044130
3230	blue	ENSBTAT00000000507
3233	blue	ENSBTAT00000065527
3238	blue	ENSBTAT00000061221
3242	blue	ENSBTAT00000009562
3244	blue	ENSBTAT00000023577
3247	blue	ENSBTAT00000004012
3249	blue	ENSBTAT00000016614
3250	blue	ENSBTAT00000064237
3251	blue	ENSBTAT00000005660
3252	blue	ENSBTAT00000013854
3258	blue	ENSBTAT00000006022
3262	blue	ENSBTAT00000007982
3264	blue	ENSBTAT00000023310
3266	blue	ENSBTAT00000063678
3267	blue	ENSBTAT00000033658
3271	blue	ENSBTAT00000024362
3273	blue	ENSBTAT00000009681
3274	blue	ENSBTAT00000000465
3282	blue	ENSBTAT00000014768
3287	blue	ENSBTAT00000061551
3291	blue	ENSBTAT00000048180
3292	blue	ENSBTAT00000023676
3301	blue	ENSBTAT00000013687
3304	blue	ENSBTAT00000019045
3305	blue	ENSBTAT00000002123
3310	blue	ENSBTAT00000023627
3312	blue	ENSBTAT00000012106
3315	blue	ENSBTAT00000002634
3316	blue	ENSBTAT00000026552
3325	blue	ENSBTAT00000006967
3326	blue	ENSBTAT00000007890
3329	blue	ENSBTAT00000021226
3330	blue	ENSBTAT00000047319
3331	blue	ENSBTAT00000006337
3332	blue	ENSBTAT00000023313
3335	blue	ENSBTAT00000001039
3337	blue	ENSBTAT00000064372
3339	blue	ENSBTAT00000024301
3348	blue	ENSBTAT00000011776
3352	blue	ENSBTAT00000009899
3364	blue	ENSBTAT00000008933
3367	blue	ENSBTAT00000003415
3368	blue	ENSBTAT00000065691
3369	blue	ENSBTAT00000001978
3371	blue	ENSBTAT00000004354
3372	blue	ENSBTAT00000066061
3374	blue	ENSBTAT00000039245
3376	blue	ENSBTAT00000018807
3381	blue	ENSBTAT00000024316
3387	blue	ENSBTAT00000021717
3391	blue	ENSBTAT00000000774
3392	blue	ENSBTAT00000044658
3401	blue	ENSBTAT00000011066
3402	blue	ENSBTAT00000001642
3403	blue	ENSBTAT00000014490
3405	blue	ENSBTAT00000057319
3406	blue	ENSBTAT00000028699
3408	blue	ENSBTAT00000016022
3419	blue	ENSBTAT00000017860
3423	blue	ENSBTAT00000011340
3424	blue	ENSBTAT00000056338
3427	blue	ENSBTAT00000023471
3428	blue	ENSBTAT00000006486
3430	blue	ENSBTAT00000027226
3435	blue	ENSBTAT00000057416
3437	blue	ENSBTAT00000027508
3443	blue	ENSBTAT00000014020
3459	blue	ENSBTAT00000065846
3460	blue	ENSBTAT00000011608
3462	blue	ENSBTAT00000034358
3463	blue	ENSBTAT00000008875
3466	blue	ENSBTAT00000033237
3472	blue	ENSBTAT00000021981
3473	blue	ENSBTAT00000006500
3480	blue	ENSBTAT00000035554
3488	blue	ENSBTAT00000053914
3494	blue	ENSBTAT00000048374
3499	blue	ENSBTAT00000043989
3501	blue	ENSBTAT00000014645
3507	blue	ENSBTAT00000064460
3508	blue	ENSBTAT00000017282
3510	blue	ENSBTAT00000005558
3514	blue	ENSBTAT00000050590
3519	blue	ENSBTAT00000023743
3521	blue	ENSBTAT00000057477
3523	blue	ENSBTAT00000001355
3525	blue	ENSBTAT00000020644
3526	blue	ENSBTAT00000047356
3534	blue	ENSBTAT00000009357
3546	blue	ENSBTAT00000023465
3552	blue	ENSBTAT00000019865
3555	blue	ENSBTAT00000026877
3556	blue	ENSBTAT00000049743
3568	blue	ENSBTAT00000024412
3580	blue	ENSBTAT00000008847
3582	blue	ENSBTAT00000009531
3585	blue	ENSBTAT00000036658
3591	blue	ENSBTAT00000043317
3593	blue	ENSBTAT00000014112
3598	blue	ENSBTAT00000047335
3599	blue	ENSBTAT00000003129
3607	blue	ENSBTAT00000010477
3608	blue	ENSBTAT00000016649
3614	blue	ENSBTAT00000022368
3615	blue	ENSBTAT00000007922
3634	blue	ENSBTAT00000028107
3638	blue	ENSBTAT00000019555
3641	blue	ENSBTAT00000005982
3647	blue	ENSBTAT00000033798
3649	blue	ENSBTAT00000065535
3652	blue	ENSBTAT00000009855
3659	blue	ENSBTAT00000011237
3660	blue	ENSBTAT00000043080
3664	blue	ENSBTAT00000047834
3666	blue	ENSBTAT00000013177
3670	blue	ENSBTAT00000002106
3677	blue	ENSBTAT00000007391
3681	blue	ENSBTAT00000011767
3682	blue	ENSBTAT00000039415
3692	blue	ENSBTAT00000061228
3693	blue	ENSBTAT00000022716
3696	blue	ENSBTAT00000015705
3697	blue	ENSBTAT00000032851
3700	blue	ENSBTAT00000014910
3702	blue	ENSBTAT00000022366
3703	blue	ENSBTAT00000013213
3706	blue	ENSBTAT00000039377
3707	blue	ENSBTAT00000016841
3714	blue	ENSBTAT00000046162
3717	blue	ENSBTAT00000018391
3724	blue	ENSBTAT00000033090
3726	blue	ENSBTAT00000008311
3729	blue	ENSBTAT00000020610
3731	blue	ENSBTAT00000046059
3737	blue	ENSBTAT00000000819
3766	blue	ENSBTAT00000026299
3767	blue	ENSBTAT00000001699
3775	blue	ENSBTAT00000019112
3778	blue	ENSBTAT00000008898
3781	blue	ENSBTAT00000060463
3784	blue	ENSBTAT00000055450
3787	blue	ENSBTAT00000044960
3788	blue	ENSBTAT00000035934
3790	blue	ENSBTAT00000000929
3792	blue	ENSBTAT00000065160
3800	blue	ENSBTAT00000033701
3809	blue	ENSBTAT00000061562
3813	blue	ENSBTAT00000017366
3818	blue	ENSBTAT00000042971
3821	blue	ENSBTAT00000049978
3823	blue	ENSBTAT00000020809
3827	blue	ENSBTAT00000013548
3828	blue	ENSBTAT00000047463
3833	blue	ENSBTAT00000018688
3840	blue	ENSBTAT00000031148
3845	blue	ENSBTAT00000019502
3847	blue	ENSBTAT00000037135
3855	blue	ENSBTAT00000032324
3860	blue	ENSBTAT00000029738
3865	blue	ENSBTAT00000027504
3866	blue	ENSBTAT00000014591
3867	blue	ENSBTAT00000022782
3875	blue	ENSBTAT00000037724
3879	blue	ENSBTAT00000061522
3882	blue	ENSBTAT00000026845
3894	blue	ENSBTAT00000020101
3905	blue	ENSBTAT00000013892
3907	blue	ENSBTAT00000036014
3908	blue	ENSBTAT00000025586
3909	blue	ENSBTAT00000025789
3910	blue	ENSBTAT00000003489
3914	blue	ENSBTAT00000036654
3916	blue	ENSBTAT00000037468
3923	blue	ENSBTAT00000011521
3925	blue	ENSBTAT00000010206
3928	blue	ENSBTAT00000006935
3929	blue	ENSBTAT00000065271
3932	blue	ENSBTAT00000028928
3933	blue	ENSBTAT00000006573
3935	blue	ENSBTAT00000064031
3938	blue	ENSBTAT00000025298
3939	blue	ENSBTAT00000054605
3940	blue	ENSBTAT00000064149
3942	blue	ENSBTAT00000010328
3944	blue	ENSBTAT00000018772
3947	blue	ENSBTAT00000020681
3949	blue	ENSBTAT00000036866
3953	blue	ENSBTAT00000045262
3958	blue	ENSBTAT00000034300
3963	blue	ENSBTAT00000047078
3969	blue	ENSBTAT00000011947
3974	blue	ENSBTAT00000047004
3975	blue	ENSBTAT00000032006
3979	blue	ENSBTAT00000017674
3986	blue	ENSBTAT00000007471
3996	blue	ENSBTAT00000002852
4000	blue	ENSBTAT00000003525
4002	blue	ENSBTAT00000048850
4005	blue	ENSBTAT00000024840
4007	blue	ENSBTAT00000052725
4008	blue	ENSBTAT00000013950
4010	blue	ENSBTAT00000004739
4015	blue	ENSBTAT00000008184
4016	blue	ENSBTAT00000007374
4024	blue	ENSBTAT00000017660
4029	blue	ENSBTAT00000025128
4032	blue	ENSBTAT00000064054
4034	blue	ENSBTAT00000004896
4036	blue	ENSBTAT00000003812
4037	blue	ENSBTAT00000002336
4040	blue	ENSBTAT00000013559
4043	blue	ENSBTAT00000061618
4046	blue	ENSBTAT00000026154
4053	blue	ENSBTAT00000044604
4054	blue	ENSBTAT00000009951
4057	blue	ENSBTAT00000006696
4066	blue	ENSBTAT00000014354
4069	blue	ENSBTAT00000020312
4073	blue	ENSBTAT00000002594
4076	blue	ENSBTAT00000020855
4077	blue	ENSBTAT00000014579
4081	blue	ENSBTAT00000061387
4082	blue	ENSBTAT00000001098
4083	blue	ENSBTAT00000010589
4085	blue	ENSBTAT00000014304
4096	blue	ENSBTAT00000002549
4098	blue	ENSBTAT00000008132
4101	blue	ENSBTAT00000014674
4105	blue	ENSBTAT00000000147
4106	blue	ENSBTAT00000006190
4115	blue	ENSBTAT00000024829
4121	blue	ENSBTAT00000026578
4123	blue	ENSBTAT00000021386
4127	blue	ENSBTAT00000053931
4138	blue	ENSBTAT00000005987
4139	blue	ENSBTAT00000062708
4141	blue	ENSBTAT00000004062
4143	blue	ENSBTAT00000025313
4146	blue	ENSBTAT00000024993
4148	blue	ENSBTAT00000052114
4149	blue	ENSBTAT00000009631
4153	blue	ENSBTAT00000038755
4154	blue	ENSBTAT00000022307
4155	blue	ENSBTAT00000020449
4158	blue	ENSBTAT00000018863
4159	blue	ENSBTAT00000049235
4165	blue	ENSBTAT00000042970
4172	blue	ENSBTAT00000012474
4174	blue	ENSBTAT00000048411
4189	blue	ENSBTAT00000046189
4200	blue	ENSBTAT00000013035
4206	blue	ENSBTAT00000027556
4211	blue	ENSBTAT00000016164
4216	blue	ENSBTAT00000015660
4227	blue	ENSBTAT00000011270
4228	blue	ENSBTAT00000061038
4231	blue	ENSBTAT00000012635
4232	blue	ENSBTAT00000061240
4234	blue	ENSBTAT00000053185
4239	blue	ENSBTAT00000011640
4242	blue	ENSBTAT00000027600
4244	blue	ENSBTAT00000004020
4252	blue	ENSBTAT00000025807
4254	blue	ENSBTAT00000004168
4257	blue	ENSBTAT00000000982
4261	blue	ENSBTAT00000007028
4265	blue	ENSBTAT00000018327
4275	blue	ENSBTAT00000022558
4276	blue	ENSBTAT00000040095
4280	blue	ENSBTAT00000002327
4283	blue	ENSBTAT00000026225
4291	blue	ENSBTAT00000010183
4293	blue	ENSBTAT00000043189
4294	blue	ENSBTAT00000018505
4299	blue	ENSBTAT00000037576
4306	blue	ENSBTAT00000026724
4317	blue	ENSBTAT00000021979
4318	blue	ENSBTAT00000022411
4325	blue	ENSBTAT00000013449
4329	blue	ENSBTAT00000012110
4333	blue	ENSBTAT00000065808
4335	blue	ENSBTAT00000064533
4338	blue	ENSBTAT00000018789
4342	blue	ENSBTAT00000010704
4343	blue	ENSBTAT00000000943
4346	blue	ENSBTAT00000014802
4347	blue	ENSBTAT00000016953
4360	blue	ENSBTAT00000028199
4365	blue	ENSBTAT00000027632
4369	blue	ENSBTAT00000001710
4375	blue	ENSBTAT00000015963
4377	blue	ENSBTAT00000015992
4382	blue	ENSBTAT00000032447
4383	blue	ENSBTAT00000024496
4385	blue	ENSBTAT00000025991
4387	blue	ENSBTAT00000032097
4388	blue	ENSBTAT00000029340
4389	blue	ENSBTAT00000027416
4394	blue	ENSBTAT00000020510
4398	blue	ENSBTAT00000020394
4403	blue	ENSBTAT00000029018
4404	blue	ENSBTAT00000011783
4408	blue	ENSBTAT00000063608
4410	blue	ENSBTAT00000056728
4415	blue	ENSBTAT00000025038
4417	blue	ENSBTAT00000065000
4418	blue	ENSBTAT00000045587
4422	blue	ENSBTAT00000018840
4423	blue	ENSBTAT00000022815
4424	blue	ENSBTAT00000006328
4430	blue	ENSBTAT00000017780
4432	blue	ENSBTAT00000009250
4438	blue	ENSBTAT00000063377
4443	blue	ENSBTAT00000019182
4448	blue	ENSBTAT00000045966
4454	blue	ENSBTAT00000017310
4455	blue	ENSBTAT00000056488
4458	blue	ENSBTAT00000021443
4459	blue	ENSBTAT00000027398
4462	blue	ENSBTAT00000022272
4465	blue	ENSBTAT00000024863
4467	blue	ENSBTAT00000018331
4473	blue	ENSBTAT00000004734
4490	blue	ENSBTAT00000026632
4497	blue	ENSBTAT00000026682
4501	blue	ENSBTAT00000009346
4502	blue	ENSBTAT00000009643
4505	blue	ENSBTAT00000056797
4506	blue	ENSBTAT00000019385
4518	blue	ENSBTAT00000026019
4523	blue	ENSBTAT00000053129
4524	blue	ENSBTAT00000026765
4531	blue	ENSBTAT00000015491
4532	blue	ENSBTAT00000061067
4535	blue	ENSBTAT00000012391
4538	blue	ENSBTAT00000055573
4547	blue	ENSBTAT00000001061
4556	blue	ENSBTAT00000061622
4558	blue	ENSBTAT00000003191
4559	blue	ENSBTAT00000056537
4562	blue	ENSBTAT00000061451
4565	blue	ENSBTAT00000011368
4571	blue	ENSBTAT00000066309
4574	blue	ENSBTAT00000017833
4578	blue	ENSBTAT00000038460
4579	blue	ENSBTAT00000029328
4581	blue	ENSBTAT00000010509
4582	blue	ENSBTAT00000011091
4583	blue	ENSBTAT00000027024
4585	blue	ENSBTAT00000025363
4588	blue	ENSBTAT00000007266
4589	blue	ENSBTAT00000047510
4590	blue	ENSBTAT00000002872
4591	blue	ENSBTAT00000061349
4597	blue	ENSBTAT00000039803
4599	blue	ENSBTAT00000020395
4603	blue	ENSBTAT00000016029
4607	blue	ENSBTAT00000001944
4612	blue	ENSBTAT00000003997
4616	blue	ENSBTAT00000023401
4617	blue	ENSBTAT00000025340
4622	blue	ENSBTAT00000002625
4625	blue	ENSBTAT00000015885
4634	blue	ENSBTAT00000008487
4642	blue	ENSBTAT00000004805
4644	blue	ENSBTAT00000053881
4645	blue	ENSBTAT00000000502
4648	blue	ENSBTAT00000049004
4651	blue	ENSBTAT00000012309
4655	blue	ENSBTAT00000012392
4656	blue	ENSBTAT00000001662
4671	blue	ENSBTAT00000001052
4672	blue	ENSBTAT00000002169
4679	blue	ENSBTAT00000012225
4693	blue	ENSBTAT00000002361
4696	blue	ENSBTAT00000025217
4705	blue	ENSBTAT00000012008
4713	blue	ENSBTAT00000021636
4714	blue	ENSBTAT00000006451
4721	blue	ENSBTAT00000032617
4723	blue	ENSBTAT00000061166
4729	blue	ENSBTAT00000002229
4735	blue	ENSBTAT00000018508
4739	blue	ENSBTAT00000053400
4740	blue	ENSBTAT00000063800
4742	blue	ENSBTAT00000009231
4743	blue	ENSBTAT00000024335
4744	blue	ENSBTAT00000032936
4745	blue	ENSBTAT00000002770
4749	blue	ENSBTAT00000064285
4750	blue	ENSBTAT00000004265
4752	blue	ENSBTAT00000064088
4756	blue	ENSBTAT00000005009
4763	blue	ENSBTAT00000024371
4764	blue	ENSBTAT00000012212
4767	blue	ENSBTAT00000026699
4769	blue	ENSBTAT00000014270
4775	blue	ENSBTAT00000028787
4781	blue	ENSBTAT00000026038
4782	blue	ENSBTAT00000025973
4788	blue	ENSBTAT00000012206
4790	blue	ENSBTAT00000001718
4802	blue	ENSBTAT00000021258
4806	blue	ENSBTAT00000017371
4807	blue	ENSBTAT00000000021
4809	blue	ENSBTAT00000053224
4812	blue	ENSBTAT00000024019
4813	blue	ENSBTAT00000055249
4819	blue	ENSBTAT00000023336
4830	blue	ENSBTAT00000008272
4832	blue	ENSBTAT00000010276
4834	blue	ENSBTAT00000022316
4843	blue	ENSBTAT00000021553
4847	blue	ENSBTAT00000061378
4853	blue	ENSBTAT00000035582
4857	blue	ENSBTAT00000029137
4869	blue	ENSBTAT00000044331
4870	blue	ENSBTAT00000024447
4871	blue	ENSBTAT00000029332
4873	blue	ENSBTAT00000022145
4878	blue	ENSBTAT00000007621
4880	blue	ENSBTAT00000001942
4881	blue	ENSBTAT00000018609
4887	blue	ENSBTAT00000026053
4888	blue	ENSBTAT00000061563
4891	blue	ENSBTAT00000001939
4893	blue	ENSBTAT00000066246
4895	blue	ENSBTAT00000061480
4897	blue	ENSBTAT00000019225
4904	blue	ENSBTAT00000015525
4906	blue	ENSBTAT00000055603
4907	blue	ENSBTAT00000033330
4908	blue	ENSBTAT00000008253
4913	blue	ENSBTAT00000011029
4914	blue	ENSBTAT00000019803
4917	blue	ENSBTAT00000049039
4918	blue	ENSBTAT00000002689
4923	blue	ENSBTAT00000036705
4925	blue	ENSBTAT00000012504
4941	blue	ENSBTAT00000007937
4947	blue	ENSBTAT00000034831
4953	blue	ENSBTAT00000018010
4956	blue	ENSBTAT00000028371
4958	blue	ENSBTAT00000018753
4961	blue	ENSBTAT00000006545
4968	blue	ENSBTAT00000001660
4969	blue	ENSBTAT00000007016
4974	blue	ENSBTAT00000005113
4975	blue	ENSBTAT00000030056
4976	blue	ENSBTAT00000043096
4982	blue	ENSBTAT00000028801
4983	blue	ENSBTAT00000008067
4985	blue	ENSBTAT00000016785
4993	blue	ENSBTAT00000004174
4997	blue	ENSBTAT00000061491
4998	blue	ENSBTAT00000024139
5001	blue	ENSBTAT00000000447
5012	blue	ENSBTAT00000026428
5022	blue	ENSBTAT00000016172
5031	blue	ENSBTAT00000017497
5034	blue	ENSBTAT00000063420
5038	blue	ENSBTAT00000027852
5043	blue	ENSBTAT00000038116
5046	blue	ENSBTAT00000008296
5051	blue	ENSBTAT00000027941
5057	blue	ENSBTAT00000010956
5061	blue	ENSBTAT00000024647
5065	blue	ENSBTAT00000029948
5067	blue	ENSBTAT00000002932
5071	blue	ENSBTAT00000009724
5076	blue	ENSBTAT00000052073
5085	blue	ENSBTAT00000014894
5094	blue	ENSBTAT00000003259
5095	blue	ENSBTAT00000018136
5096	blue	ENSBTAT00000015277
5098	blue	ENSBTAT00000010787
5100	blue	ENSBTAT00000015799
5102	blue	ENSBTAT00000000086
5103	blue	ENSBTAT00000021617
5111	blue	ENSBTAT00000020418
5113	blue	ENSBTAT00000014953
5114	blue	ENSBTAT00000002860
5115	blue	ENSBTAT00000005629
5116	blue	ENSBTAT00000026901
5123	blue	ENSBTAT00000003537
5128	blue	ENSBTAT00000025492
5131	blue	ENSBTAT00000005655
5135	blue	ENSBTAT00000031396
5137	blue	ENSBTAT00000052238
5143	blue	ENSBTAT00000066066
5149	blue	ENSBTAT00000028693
5150	blue	ENSBTAT00000010913
5155	blue	ENSBTAT00000006593
5168	blue	ENSBTAT00000006491
5171	blue	ENSBTAT00000003435
5175	blue	ENSBTAT00000065740
5179	blue	ENSBTAT00000003332
5184	blue	ENSBTAT00000027488
5185	blue	ENSBTAT00000045850
5188	blue	ENSBTAT00000005796
5195	blue	ENSBTAT00000056935
5196	blue	ENSBTAT00000064733
5201	blue	ENSBTAT00000017114
5203	blue	ENSBTAT00000064382
5205	blue	ENSBTAT00000014996
5206	blue	ENSBTAT00000024326
5211	blue	ENSBTAT00000015064
5220	blue	ENSBTAT00000048660
5222	blue	ENSBTAT00000028718
5225	blue	ENSBTAT00000013440
5234	blue	ENSBTAT00000000857
5238	blue	ENSBTAT00000025985
5248	blue	ENSBTAT00000054726
5249	blue	ENSBTAT00000048428
5260	blue	ENSBTAT00000018261
5262	blue	ENSBTAT00000055001
5266	blue	ENSBTAT00000044517
5269	blue	ENSBTAT00000004623
5271	blue	ENSBTAT00000023725
5286	blue	ENSBTAT00000013356
5291	blue	ENSBTAT00000046234
5296	blue	ENSBTAT00000017229
5300	blue	ENSBTAT00000039356
5302	blue	ENSBTAT00000015318
5306	blue	ENSBTAT00000019765
5309	blue	ENSBTAT00000035359
5314	blue	ENSBTAT00000015932
5317	blue	ENSBTAT00000010525
5320	blue	ENSBTAT00000064335
5324	blue	ENSBTAT00000046887
5325	blue	ENSBTAT00000029362
5328	blue	ENSBTAT00000023359
5330	blue	ENSBTAT00000014368
5331	blue	ENSBTAT00000060991
5337	blue	ENSBTAT00000014792
5338	blue	ENSBTAT00000031033
5341	blue	ENSBTAT00000061585
5343	blue	ENSBTAT00000007832
5345	blue	ENSBTAT00000027362
5347	blue	ENSBTAT00000025497
5351	blue	ENSBTAT00000065075
5354	blue	ENSBTAT00000027778
5361	blue	ENSBTAT00000007611
5372	blue	ENSBTAT00000029026
5375	blue	ENSBTAT00000004227
5379	blue	ENSBTAT00000019970
5385	blue	ENSBTAT00000016514
5393	blue	ENSBTAT00000063283
5401	blue	ENSBTAT00000007876
5403	blue	ENSBTAT00000022534
5404	blue	ENSBTAT00000011251
5405	blue	ENSBTAT00000064656
5406	blue	ENSBTAT00000017197
5407	blue	ENSBTAT00000007784
5410	blue	ENSBTAT00000008831
5411	blue	ENSBTAT00000017667
5418	blue	ENSBTAT00000021686
5419	blue	ENSBTAT00000049336
5422	blue	ENSBTAT00000064166
5427	blue	ENSBTAT00000024063
5430	blue	ENSBTAT00000018032
5435	blue	ENSBTAT00000022185
5437	blue	ENSBTAT00000008924
5439	blue	ENSBTAT00000003585
5446	blue	ENSBTAT00000000010
5450	blue	ENSBTAT00000023877
5451	blue	ENSBTAT00000015881
5454	blue	ENSBTAT00000065830
5455	blue	ENSBTAT00000026744
5462	blue	ENSBTAT00000043044
5464	blue	ENSBTAT00000027649
5467	blue	ENSBTAT00000025935
5468	blue	ENSBTAT00000012602
5469	blue	ENSBTAT00000007946
5470	blue	ENSBTAT00000019177
5477	blue	ENSBTAT00000054178
5480	blue	ENSBTAT00000025542
5482	blue	ENSBTAT00000004051
5483	blue	ENSBTAT00000005408
5485	blue	ENSBTAT00000006737
5486	blue	ENSBTAT00000014014
5500	blue	ENSBTAT00000065373
5503	blue	ENSBTAT00000002434
5536	blue	ENSBTAT00000007371
5537	blue	ENSBTAT00000003382
5544	blue	ENSBTAT00000026420
5546	blue	ENSBTAT00000045078
5547	blue	ENSBTAT00000063041
5548	blue	ENSBTAT00000019500
5549	blue	ENSBTAT00000015484
5552	blue	ENSBTAT00000013301
5556	blue	ENSBTAT00000002316
5564	blue	ENSBTAT00000019602
5572	blue	ENSBTAT00000008456
5576	blue	ENSBTAT00000045235
5580	blue	ENSBTAT00000060877
5582	blue	ENSBTAT00000061351
5583	blue	ENSBTAT00000009149
5584	blue	ENSBTAT00000007161
5590	blue	ENSBTAT00000006101
5591	blue	ENSBTAT00000026389
5593	blue	ENSBTAT00000025093
5594	blue	ENSBTAT00000048949
5597	blue	ENSBTAT00000016956
5601	blue	ENSBTAT00000012777
5602	blue	ENSBTAT00000063304
5603	blue	ENSBTAT00000028263
5606	blue	ENSBTAT00000009087
5613	blue	ENSBTAT00000023654
5614	blue	ENSBTAT00000011993
5623	blue	ENSBTAT00000027685
5631	blue	ENSBTAT00000064711
5638	blue	ENSBTAT00000002335
5640	blue	ENSBTAT00000039096
5645	blue	ENSBTAT00000028310
5653	blue	ENSBTAT00000024057
5657	blue	ENSBTAT00000005131
5660	blue	ENSBTAT00000012331
5661	blue	ENSBTAT00000021566
5669	blue	ENSBTAT00000031486
5673	blue	ENSBTAT00000028949
5676	blue	ENSBTAT00000024413
5684	blue	ENSBTAT00000005508
5691	blue	ENSBTAT00000025606
5692	blue	ENSBTAT00000021894
5696	blue	ENSBTAT00000051852
5698	blue	ENSBTAT00000025666
5699	blue	ENSBTAT00000029017
5701	blue	ENSBTAT00000003618
5712	blue	ENSBTAT00000044681
5715	blue	ENSBTAT00000010797
5716	blue	ENSBTAT00000028661
5718	blue	ENSBTAT00000020168
5721	blue	ENSBTAT00000020347
5732	blue	ENSBTAT00000042719
5734	blue	ENSBTAT00000064787
5744	blue	ENSBTAT00000027843
5747	blue	ENSBTAT00000027339
5759	blue	ENSBTAT00000013781
5761	blue	ENSBTAT00000001214
5763	blue	ENSBTAT00000004465
5767	blue	ENSBTAT00000055237
5769	blue	ENSBTAT00000026841
5772	blue	ENSBTAT00000020352
5776	blue	ENSBTAT00000027722
5779	blue	ENSBTAT00000017080
5780	blue	ENSBTAT00000065774
5782	blue	ENSBTAT00000020353
5787	blue	ENSBTAT00000065591
5789	blue	ENSBTAT00000017659
5798	blue	ENSBTAT00000026200
5799	blue	ENSBTAT00000010351
5804	blue	ENSBTAT00000043412
5805	blue	ENSBTAT00000061397
5807	blue	ENSBTAT00000008507
5809	blue	ENSBTAT00000016266
5811	blue	ENSBTAT00000017848
5812	blue	ENSBTAT00000016160
5813	blue	ENSBTAT00000029363
5815	blue	ENSBTAT00000026153
5816	blue	ENSBTAT00000064463
5818	blue	ENSBTAT00000001409
5819	blue	ENSBTAT00000066266
5820	blue	ENSBTAT00000016464
5826	blue	ENSBTAT00000005889
5840	blue	ENSBTAT00000028994
5850	blue	ENSBTAT00000025156
5856	blue	ENSBTAT00000061249
5857	blue	ENSBTAT00000033522
5859	blue	ENSBTAT00000061626
5865	blue	ENSBTAT00000002985
5867	blue	ENSBTAT00000022303
5873	blue	ENSBTAT00000000601
5877	blue	ENSBTAT00000028425
5882	blue	ENSBTAT00000006725
5885	blue	ENSBTAT00000061575
5887	blue	ENSBTAT00000033225
5892	blue	ENSBTAT00000063951
5893	blue	ENSBTAT00000016650
5894	blue	ENSBTAT00000013909
5897	blue	ENSBTAT00000047703
5898	blue	ENSBTAT00000022459
5902	blue	ENSBTAT00000001080
5904	blue	ENSBTAT00000006897
5906	blue	ENSBTAT00000028551
5915	blue	ENSBTAT00000012207
5917	blue	ENSBTAT00000020202
5927	blue	ENSBTAT00000053957
5933	blue	ENSBTAT00000033975
5936	blue	ENSBTAT00000045181
5946	blue	ENSBTAT00000021755
5947	blue	ENSBTAT00000019050
5949	blue	ENSBTAT00000007054
5957	blue	ENSBTAT00000004188
5959	blue	ENSBTAT00000052944
5960	blue	ENSBTAT00000021658
5962	blue	ENSBTAT00000011468
5963	blue	ENSBTAT00000044060
5971	blue	ENSBTAT00000021581
5980	blue	ENSBTAT00000019822
5984	blue	ENSBTAT00000001791
5986	blue	ENSBTAT00000018691
5988	blue	ENSBTAT00000005639
5993	blue	ENSBTAT00000020215
5995	blue	ENSBTAT00000031006
6008	blue	ENSBTAT00000017816
6009	blue	ENSBTAT00000059708
6014	blue	ENSBTAT00000014478
6017	blue	ENSBTAT00000011798
6018	blue	ENSBTAT00000000331
6023	blue	ENSBTAT00000028072
6029	blue	ENSBTAT00000012921
6032	blue	ENSBTAT00000029119
6035	blue	ENSBTAT00000000217
6041	blue	ENSBTAT00000053067
6046	blue	ENSBTAT00000023131
6047	blue	ENSBTAT00000023068
6048	blue	ENSBTAT00000014922
6051	blue	ENSBTAT00000064363
6053	blue	ENSBTAT00000039968
6058	blue	ENSBTAT00000013481
6066	blue	ENSBTAT00000005529
6069	blue	ENSBTAT00000020365
6075	blue	ENSBTAT00000036460
6079	blue	ENSBTAT00000063531
6082	blue	ENSBTAT00000010762
6087	blue	ENSBTAT00000023625
6095	blue	ENSBTAT00000026812
6098	blue	ENSBTAT00000045935
6101	blue	ENSBTAT00000006754
6104	blue	ENSBTAT00000004878
6105	blue	ENSBTAT00000061184
6113	blue	ENSBTAT00000007959
6119	blue	ENSBTAT00000014960
6126	blue	ENSBTAT00000023349
6129	blue	ENSBTAT00000016702
6134	blue	ENSBTAT00000057251
6135	blue	ENSBTAT00000025957
6137	blue	ENSBTAT00000039829
6148	blue	ENSBTAT00000005749
6152	blue	ENSBTAT00000052373
6157	blue	ENSBTAT00000002665
6162	blue	ENSBTAT00000020461
6167	blue	ENSBTAT00000034627
6168	blue	ENSBTAT00000037359
6171	blue	ENSBTAT00000049751
6172	blue	ENSBTAT00000044136
6175	blue	ENSBTAT00000024228
6176	blue	ENSBTAT00000003163
6184	blue	ENSBTAT00000024692
6185	blue	ENSBTAT00000000325
6186	blue	ENSBTAT00000012966
6198	blue	ENSBTAT00000057162
6201	blue	ENSBTAT00000053811
6208	blue	ENSBTAT00000005939
6213	blue	ENSBTAT00000011949
6217	blue	ENSBTAT00000018899
6227	blue	ENSBTAT00000027338
6247	blue	ENSBTAT00000036142
6253	blue	ENSBTAT00000028950
6270	blue	ENSBTAT00000042613
6274	blue	ENSBTAT00000006739
6275	blue	ENSBTAT00000019004
6276	blue	ENSBTAT00000002120
6277	blue	ENSBTAT00000015819
6278	blue	ENSBTAT00000061615
6281	blue	ENSBTAT00000011092
6284	blue	ENSBTAT00000003999
6286	blue	ENSBTAT00000039902
6292	blue	ENSBTAT00000028133
6296	blue	ENSBTAT00000026745
6300	blue	ENSBTAT00000024134
6302	blue	ENSBTAT00000014908
6305	blue	ENSBTAT00000053005
6307	blue	ENSBTAT00000019119
6308	blue	ENSBTAT00000064522
6312	blue	ENSBTAT00000046471
6314	blue	ENSBTAT00000002839
6315	blue	ENSBTAT00000031059
6318	blue	ENSBTAT00000004650
6332	blue	ENSBTAT00000029080
6334	blue	ENSBTAT00000054711
6335	blue	ENSBTAT00000047301
6343	blue	ENSBTAT00000061103
6344	blue	ENSBTAT00000002220
6345	blue	ENSBTAT00000002017
6356	blue	ENSBTAT00000043028
6363	blue	ENSBTAT00000001851
6375	blue	ENSBTAT00000029282
6381	blue	ENSBTAT00000064532
6383	blue	ENSBTAT00000017756
6385	blue	ENSBTAT00000025826
6388	blue	ENSBTAT00000063185
6391	blue	ENSBTAT00000007997
6396	blue	ENSBTAT00000001346
6402	blue	ENSBTAT00000003305
6403	blue	ENSBTAT00000008576
6405	blue	ENSBTAT00000061139
6414	blue	ENSBTAT00000013862
6415	blue	ENSBTAT00000008070
6420	blue	ENSBTAT00000005622
6424	blue	ENSBTAT00000005016
6428	blue	ENSBTAT00000032050
6430	blue	ENSBTAT00000028079
6432	blue	ENSBTAT00000025922
6441	blue	ENSBTAT00000000181
6442	blue	ENSBTAT00000023707
6444	blue	ENSBTAT00000047985
6445	blue	ENSBTAT00000014537
6447	blue	ENSBTAT00000066124
6457	blue	ENSBTAT00000029195
6462	blue	ENSBTAT00000064932
6465	blue	ENSBTAT00000024759
6470	blue	ENSBTAT00000025796
6472	blue	ENSBTAT00000042645
6473	blue	ENSBTAT00000018472
6475	blue	ENSBTAT00000019852
6481	blue	ENSBTAT00000005760
6482	blue	ENSBTAT00000013736
6488	blue	ENSBTAT00000056101
6491	blue	ENSBTAT00000054014
6492	blue	ENSBTAT00000043605
6494	blue	ENSBTAT00000046413
6503	blue	ENSBTAT00000025816
6510	blue	ENSBTAT00000024367
6516	blue	ENSBTAT00000043297
6521	blue	ENSBTAT00000061030
6523	blue	ENSBTAT00000008292
6526	blue	ENSBTAT00000038390
6530	blue	ENSBTAT00000047061
6536	blue	ENSBTAT00000020766
6538	blue	ENSBTAT00000024505
6539	blue	ENSBTAT00000001886
6542	blue	ENSBTAT00000012529
6544	blue	ENSBTAT00000017839
6548	blue	ENSBTAT00000003165
6549	blue	ENSBTAT00000055044
6553	blue	ENSBTAT00000037527
6561	blue	ENSBTAT00000004272
6562	blue	ENSBTAT00000039686
6574	blue	ENSBTAT00000061133
6576	blue	ENSBTAT00000023334
6590	blue	ENSBTAT00000045230
6593	blue	ENSBTAT00000000259
6597	blue	ENSBTAT00000017503
6601	blue	ENSBTAT00000001309
6602	blue	ENSBTAT00000032251
6612	blue	ENSBTAT00000033256
6613	blue	ENSBTAT00000048703
6616	blue	ENSBTAT00000009334
6620	blue	ENSBTAT00000023710
6622	blue	ENSBTAT00000017593
6632	blue	ENSBTAT00000022287
6633	blue	ENSBTAT00000001063
6638	blue	ENSBTAT00000004568
6644	blue	ENSBTAT00000011359
6647	blue	ENSBTAT00000027321
6648	blue	ENSBTAT00000056280
6655	blue	ENSBTAT00000017575
6656	blue	ENSBTAT00000015189
6659	blue	ENSBTAT00000024122
6669	blue	ENSBTAT00000044940
6672	blue	ENSBTAT00000029827
6679	blue	ENSBTAT00000002168
6688	blue	ENSBTAT00000015760
6695	blue	ENSBTAT00000057115
6697	blue	ENSBTAT00000006292
6699	blue	ENSBTAT00000045907
6701	blue	ENSBTAT00000044005
6702	blue	ENSBTAT00000001512
6708	blue	ENSBTAT00000019505
6712	blue	ENSBTAT00000017897
6714	blue	ENSBTAT00000060965
6719	blue	ENSBTAT00000002967
6721	blue	ENSBTAT00000007033
6724	blue	ENSBTAT00000009339
6726	blue	ENSBTAT00000016421
6728	blue	ENSBTAT00000004881
6732	blue	ENSBTAT00000035212
6736	blue	ENSBTAT00000008352
6749	blue	ENSBTAT00000001371
6751	blue	ENSBTAT00000017554
6759	blue	ENSBTAT00000064392
6763	blue	ENSBTAT00000057061
6777	blue	ENSBTAT00000023454
6779	blue	ENSBTAT00000014072
6782	blue	ENSBTAT00000031066
6783	blue	ENSBTAT00000007606
6786	blue	ENSBTAT00000060247
6801	blue	ENSBTAT00000022987
6806	blue	ENSBTAT00000009208
6808	blue	ENSBTAT00000026553
6809	blue	ENSBTAT00000021156
6810	blue	ENSBTAT00000016972
6812	blue	ENSBTAT00000027115
6815	blue	ENSBTAT00000064621
6818	blue	ENSBTAT00000012961
6822	blue	ENSBTAT00000019901
6827	blue	ENSBTAT00000064542
6833	blue	ENSBTAT00000006351
6835	blue	ENSBTAT00000008416
6836	blue	ENSBTAT00000061070
6837	blue	ENSBTAT00000040276
6842	blue	ENSBTAT00000029071
6843	blue	ENSBTAT00000023441
6844	blue	ENSBTAT00000061554
6848	blue	ENSBTAT00000021408
6849	blue	ENSBTAT00000027039
6868	blue	ENSBTAT00000013076
6871	blue	ENSBTAT00000036540
6886	blue	ENSBTAT00000020608
6887	blue	ENSBTAT00000006309
6889	blue	ENSBTAT00000012175
6890	blue	ENSBTAT00000026242
6906	blue	ENSBTAT00000004052
6917	blue	ENSBTAT00000005868
6926	blue	ENSBTAT00000054042
6928	blue	ENSBTAT00000005257
6941	blue	ENSBTAT00000014154
6942	blue	ENSBTAT00000015139
6952	blue	ENSBTAT00000028493
6954	blue	ENSBTAT00000029070
6959	blue	ENSBTAT00000026757
6963	blue	ENSBTAT00000020207
6965	blue	ENSBTAT00000025950
6967	blue	ENSBTAT00000031803
6970	blue	ENSBTAT00000021832
6982	blue	ENSBTAT00000049233
6986	blue	ENSBTAT00000005959
6992	blue	ENSBTAT00000016043
7010	blue	ENSBTAT00000011980
7012	blue	ENSBTAT00000001167
7013	blue	ENSBTAT00000008068
7016	blue	ENSBTAT00000020616
7019	blue	ENSBTAT00000023089
7020	blue	ENSBTAT00000040289
7037	blue	ENSBTAT00000046974
7041	blue	ENSBTAT00000002607
7045	blue	ENSBTAT00000007564
7047	blue	ENSBTAT00000016994
7048	blue	ENSBTAT00000063486
7054	blue	ENSBTAT00000013696
7060	blue	ENSBTAT00000063294
7063	blue	ENSBTAT00000010703
7068	blue	ENSBTAT00000015700
7069	blue	ENSBTAT00000009987
7070	blue	ENSBTAT00000008822
7071	blue	ENSBTAT00000022854
7072	blue	ENSBTAT00000025250
7075	blue	ENSBTAT00000047926
7076	blue	ENSBTAT00000027006
7081	blue	ENSBTAT00000061045
7083	blue	ENSBTAT00000033962
7085	blue	ENSBTAT00000018500
7092	blue	ENSBTAT00000012736
7097	blue	ENSBTAT00000061225
7102	blue	ENSBTAT00000015193
7125	blue	ENSBTAT00000057182
7127	blue	ENSBTAT00000023740
7130	blue	ENSBTAT00000024873
7133	blue	ENSBTAT00000038313
7138	blue	ENSBTAT00000064827
7140	blue	ENSBTAT00000027811
7142	blue	ENSBTAT00000036177
7146	blue	ENSBTAT00000008355
7152	blue	ENSBTAT00000030211
7156	blue	ENSBTAT00000011877
7157	blue	ENSBTAT00000011979
7168	blue	ENSBTAT00000022422
7173	blue	ENSBTAT00000049094
7174	blue	ENSBTAT00000012773
7177	blue	ENSBTAT00000039179
7184	blue	ENSBTAT00000025159
7186	blue	ENSBTAT00000042576
7189	blue	ENSBTAT00000002833
7195	blue	ENSBTAT00000001094
7225	blue	ENSBTAT00000066137
7230	blue	ENSBTAT00000011411
7232	blue	ENSBTAT00000026006
7236	blue	ENSBTAT00000064499
7243	blue	ENSBTAT00000055077
7245	blue	ENSBTAT00000052066
7247	blue	ENSBTAT00000005606
7254	blue	ENSBTAT00000012570
7264	blue	ENSBTAT00000024485
7267	blue	ENSBTAT00000045541
7277	blue	ENSBTAT00000004876
7278	blue	ENSBTAT00000025502
7281	blue	ENSBTAT00000018250
7282	blue	ENSBTAT00000002364
7286	blue	ENSBTAT00000009761
7290	blue	ENSBTAT00000012034
7291	blue	ENSBTAT00000042733
7298	blue	ENSBTAT00000000210
7306	blue	ENSBTAT00000026023
7317	blue	ENSBTAT00000019702
7333	blue	ENSBTAT00000056141
7334	blue	ENSBTAT00000012137
7335	blue	ENSBTAT00000015403
7337	blue	ENSBTAT00000038632
7344	blue	ENSBTAT00000063833
7346	blue	ENSBTAT00000017728
7356	blue	ENSBTAT00000008749
7357	blue	ENSBTAT00000025446
7359	blue	ENSBTAT00000050765
7363	blue	ENSBTAT00000014220
7364	blue	ENSBTAT00000014754
7367	blue	ENSBTAT00000003297
7373	blue	ENSBTAT00000053205
7374	blue	ENSBTAT00000024158
7375	blue	ENSBTAT00000015682
7376	blue	ENSBTAT00000021869
7378	blue	ENSBTAT00000027950
7386	blue	ENSBTAT00000028997
7387	blue	ENSBTAT00000012526
7388	blue	ENSBTAT00000011803
7389	blue	ENSBTAT00000014463
7390	blue	ENSBTAT00000066145
7399	blue	ENSBTAT00000005978
7400	blue	ENSBTAT00000010650
7402	blue	ENSBTAT00000016093
7403	blue	ENSBTAT00000061639
7404	blue	ENSBTAT00000024658
7408	blue	ENSBTAT00000011964
7409	blue	ENSBTAT00000029098
7411	blue	ENSBTAT00000007159
7417	blue	ENSBTAT00000025424
7424	blue	ENSBTAT00000038166
7428	blue	ENSBTAT00000002992
7429	blue	ENSBTAT00000006458
7430	blue	ENSBTAT00000023404
7434	blue	ENSBTAT00000032958
7436	blue	ENSBTAT00000022882
7440	blue	ENSBTAT00000056498
7442	blue	ENSBTAT00000001241
7447	blue	ENSBTAT00000045023
7450	blue	ENSBTAT00000065505
7451	blue	ENSBTAT00000020520
7455	blue	ENSBTAT00000061242
7461	blue	ENSBTAT00000013450
7463	blue	ENSBTAT00000003560
7467	blue	ENSBTAT00000064082
7477	blue	ENSBTAT00000022111
7479	blue	ENSBTAT00000021035
7483	blue	ENSBTAT00000015643
7498	blue	ENSBTAT00000012161
7499	blue	ENSBTAT00000007855
7508	blue	ENSBTAT00000001914
7510	blue	ENSBTAT00000000186
7511	blue	ENSBTAT00000028521
7513	blue	ENSBTAT00000001745
7518	blue	ENSBTAT00000044068
7529	blue	ENSBTAT00000001619
7537	blue	ENSBTAT00000005648
7542	blue	ENSBTAT00000023262
7545	blue	ENSBTAT00000010806
7553	blue	ENSBTAT00000022780
7562	blue	ENSBTAT00000005242
7563	blue	ENSBTAT00000020206
7566	blue	ENSBTAT00000034569
7572	blue	ENSBTAT00000027837
7578	blue	ENSBTAT00000061453
7588	blue	ENSBTAT00000022015
7591	blue	ENSBTAT00000026800
7592	blue	ENSBTAT00000056187
7594	blue	ENSBTAT00000003636
7595	blue	ENSBTAT00000042599
7604	blue	ENSBTAT00000017358
7610	blue	ENSBTAT00000037341
7611	blue	ENSBTAT00000064252
7615	blue	ENSBTAT00000024782
7622	blue	ENSBTAT00000055094
7628	blue	ENSBTAT00000006107
7634	blue	ENSBTAT00000011469
7639	blue	ENSBTAT00000056122
7641	blue	ENSBTAT00000054497
7642	blue	ENSBTAT00000012489
7645	blue	ENSBTAT00000065073
7650	blue	ENSBTAT00000020108
7652	blue	ENSBTAT00000023483
7655	blue	ENSBTAT00000050399
7661	blue	ENSBTAT00000005280
7663	blue	ENSBTAT00000013173
7667	blue	ENSBTAT00000019313
7670	blue	ENSBTAT00000001474
7674	blue	ENSBTAT00000056330
7675	blue	ENSBTAT00000024457
7683	blue	ENSBTAT00000008751
7689	blue	ENSBTAT00000023247
7692	blue	ENSBTAT00000012252
7693	blue	ENSBTAT00000045089
7695	blue	ENSBTAT00000052144
7700	blue	ENSBTAT00000000860
7704	blue	ENSBTAT00000063589
7706	blue	ENSBTAT00000049318
7714	blue	ENSBTAT00000003609
7717	blue	ENSBTAT00000003832
7718	blue	ENSBTAT00000002691
7722	blue	ENSBTAT00000013953
7730	blue	ENSBTAT00000042563
7737	blue	ENSBTAT00000018848
7740	blue	ENSBTAT00000029218
7750	blue	ENSBTAT00000021791
7753	blue	ENSBTAT00000002038
7762	blue	ENSBTAT00000056429
7770	blue	ENSBTAT00000000084
7772	blue	ENSBTAT00000035283
7774	blue	ENSBTAT00000029090
7777	blue	ENSBTAT00000032325
7781	blue	ENSBTAT00000035087
7784	blue	ENSBTAT00000007566
7787	blue	ENSBTAT00000026361
7789	blue	ENSBTAT00000006572
7800	blue	ENSBTAT00000024303
7827	blue	ENSBTAT00000021525
7828	blue	ENSBTAT00000002191
7831	blue	ENSBTAT00000018063
7835	blue	ENSBTAT00000063770
7847	blue	ENSBTAT00000012511
7848	blue	ENSBTAT00000038585
7849	blue	ENSBTAT00000061600
7861	blue	ENSBTAT00000006810
7864	blue	ENSBTAT00000010773
7865	blue	ENSBTAT00000007743
7875	blue	ENSBTAT00000017435
7876	blue	ENSBTAT00000001466
7884	blue	ENSBTAT00000049041
7890	blue	ENSBTAT00000001908
7892	blue	ENSBTAT00000002357
7900	blue	ENSBTAT00000002703
7904	blue	ENSBTAT00000043938
7905	blue	ENSBTAT00000012726
7908	blue	ENSBTAT00000038341
7910	blue	ENSBTAT00000023090
7919	blue	ENSBTAT00000009158
7921	blue	ENSBTAT00000021099
7924	blue	ENSBTAT00000017996
7925	blue	ENSBTAT00000020151
7929	blue	ENSBTAT00000006782
7931	blue	ENSBTAT00000011476
7941	blue	ENSBTAT00000022222
7944	blue	ENSBTAT00000017878
7949	blue	ENSBTAT00000021471
7951	blue	ENSBTAT00000004154
7952	blue	ENSBTAT00000016466
7958	blue	ENSBTAT00000024080
7963	blue	ENSBTAT00000008390
7966	blue	ENSBTAT00000012704
7975	blue	ENSBTAT00000020656
7986	blue	ENSBTAT00000012769
7988	blue	ENSBTAT00000034821
7994	blue	ENSBTAT00000029669
7997	blue	ENSBTAT00000023517
7998	blue	ENSBTAT00000001169
8013	blue	ENSBTAT00000003195
8016	blue	ENSBTAT00000063539
8021	blue	ENSBTAT00000056154
8024	blue	ENSBTAT00000043746
8026	blue	ENSBTAT00000037047
8029	blue	ENSBTAT00000000853
8032	blue	ENSBTAT00000011464
8034	blue	ENSBTAT00000020203
8075	blue	ENSBTAT00000013075
8083	blue	ENSBTAT00000045464
8084	blue	ENSBTAT00000018998
8086	blue	ENSBTAT00000064584
8102	blue	ENSBTAT00000043826
8110	blue	ENSBTAT00000048714
8116	blue	ENSBTAT00000038115
8123	blue	ENSBTAT00000066076
8132	blue	ENSBTAT00000020368
8139	blue	ENSBTAT00000022070
8153	blue	ENSBTAT00000007157
8154	blue	ENSBTAT00000002973
8158	blue	ENSBTAT00000020456
8159	blue	ENSBTAT00000027093
8163	blue	ENSBTAT00000014899
8164	blue	ENSBTAT00000006221
8170	blue	ENSBTAT00000060967
8174	blue	ENSBTAT00000045447
8181	blue	ENSBTAT00000022493
8184	blue	ENSBTAT00000020240
8185	blue	ENSBTAT00000054796
8189	blue	ENSBTAT00000003514
8192	blue	ENSBTAT00000043032
8197	blue	ENSBTAT00000006395
8198	blue	ENSBTAT00000022481
8200	blue	ENSBTAT00000005925
8202	blue	ENSBTAT00000061414
8216	blue	ENSBTAT00000009536
8224	blue	ENSBTAT00000020478
8225	blue	ENSBTAT00000028864
8228	blue	ENSBTAT00000000918
8229	blue	ENSBTAT00000024311
8231	blue	ENSBTAT00000013472
8232	blue	ENSBTAT00000008587
8243	blue	ENSBTAT00000002887
8249	blue	ENSBTAT00000020876
8251	blue	ENSBTAT00000009799
8253	blue	ENSBTAT00000052375
8269	blue	ENSBTAT00000016680
8275	blue	ENSBTAT00000061251
8276	blue	ENSBTAT00000014925
8280	blue	ENSBTAT00000021978
8283	blue	ENSBTAT00000025281
8286	blue	ENSBTAT00000056983
8299	blue	ENSBTAT00000027917
[truncated: 335 more rows]
